# Supplementary material
Source: PubMed Central journal article supplement (PMC3136265)
Supplement: 1101907108_pnas.201101907SI.pdf [file 1101907108_pnas.201101907SI.pdf]

# Supporting Information

Winget et al. 10.1073/pnas.1101907108

## SI Materials and Methods

**Sampling Locations.** Surface water samples were collected from stations CB908 (39°08'N, 76°20'W), CB858 (38°58'N, 76°23'W), CB818 (38°18'N, 76°17'W), CB804 (38°04'N, 76°13'W), and CB707 (37°07'N, 76°07'W) on 24 occasions (September 2002; March, April, June, July, August, and October 2003; February, March, May, June, July, August, and October 2004; February, May, July, August, and October 2005; March, June, July, and November 2006; February 2007; Fig. S3). Station CB858 and CB707 were sampled on all research cruises, but station CB908 was only sampled in 2002–2003. One mesohaline station, either CB804 or CB818, was also sampled on each sampling date. Temperature and salinity measurements were recorded from the last surface water Niskin bottle that was closed on the conductivity–temperature–depth. Concentrations of ammonia, nitrate and nitrite, and phosphate were determined from a 50-mL water sample collected concurrently with abundance sampling as reported (1). OC and silica concentrations, stream flow, and tide data were retrieved from online depositories provided by the Chesapeake Bay Program (ref. 1; [www.chesapeakebay.net/data\\_waterquality.aspx](http://www.chesapeakebay.net/data_waterquality.aspx)), the United States Geological Survey ([va.water.usgs.gov/chesbay/RIMP/adaps2/susq.adaps.dat](http://va.water.usgs.gov/chesbay/RIMP/adaps2/susq.adaps.dat) list site), and the National Oceanic and Atmospheric Administration ([www.co-ops.nos.noaa.gov/](http://www.co-ops.nos.noaa.gov/)).

**VP Methodological Considerations.** Several factors can influence the accuracy of VP estimates, and the following precautions were taken. First, cycles of VP and decay can occur faster than the 12-h incubation period monitored in this study (2). Calculating the VP rate based only on increases in VA, i.e., the slope of a first-order regression between initial VA and time points showing in-

creasing VA in a 12-h incubation (2), can account for these cycles. Applying this approach produced the same spatial and temporal trends observed in the original calculation. The same filtration flow rates and processing times were used in all experiments. VP samples were consistently collected between 6:00 AM and noon to avoid introduction of diel variations (2).

**Statistical Calculations and Analyses.** VP was calculated as the slope of the first-order linear regression line from plots of VA over time (Table S3). For each experiment, VP estimates were corrected for bacterial loss during diafiltration (Table S3; ref. 3). Outliers in replicate VP estimates, defined as greater or less than two SD from the mean of the other two replicates, were removed. Viral burst sizes were empirically derived from changes in VA and BA within VP incubations (Table S3). All VP was assumed to result from bacterial cell lysis. Estimates of VMM, the amount of dissolved OC released by viral lysis, %BA lysed per hour, and %BP consumed by viral lysis were calculated from an assumed burst size of 50 viruses released per cell lysed (3) and from empirically derived burst sizes using the equations in Table S3. Viral turnover time was also calculated (Table S3). Negative values were removed before statistical analysis and mean calculations. All data were log transformed to meet requirements for parametric statistical tests. Statistical tests were performed by using SPSS 11 software (SPSS, Inc.). Contour plots were generated by using Aable (v2.1.0, Gigawiz). Seasons were defined as follows: winter, December 22–March 21; spring, March 22–June 21; summer, June 22–September 21; and autumn, September 22–December 21.

1. Kan JJ, Wang K, Chen F (2006) Temporal variation and detection limit of an estuarine bacterioplankton community analyzed by denaturing gradient gel electrophoresis (DGGE). *Aquat Microb Ecol* 42:7–18.
2. Winget DM, Wommack KE (2009) Diel and daily fluctuations in virioplankton production in coastal ecosystems. *Environ Microbiol* 11:2904–2914.

3. Wilhelm SW, Brigden SM, Suttle CA (2002) A dilution technique for the direct measurement of viral production: a comparison in stratified and tidally mixed coastal waters. *Microb Ecol* 43:168–173.

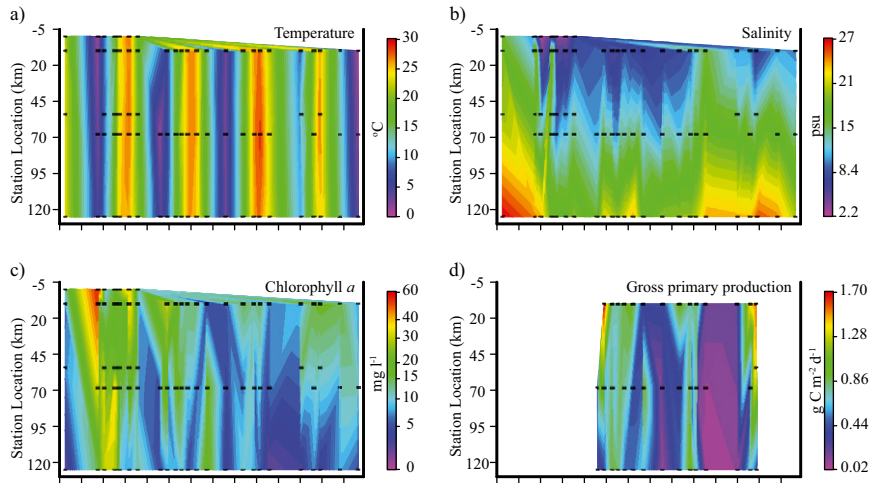

**Fig. S1.** Surface water temperature (*A*), salinity (*B*), Chl *a* (*C*), and gross primary production (*D*). Sampling locations are given in kilometers south from station CB908 (0 km). Black squares represent dates and locations of sample collections.

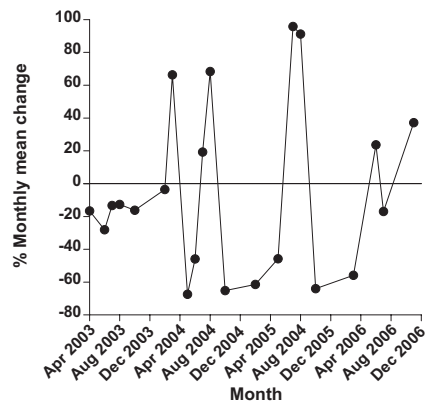

**Fig. S2.** Monthly mean changes in VP, calculated as (monthly VP mean/yearly VP mean) × 100. Peaks in each year occur in early spring and late summer through fall. Data for 2002 and 2007 were not included, as the monthly mean equaled the yearly mean for these years. Data for March 2003 are not plotted, as this month was an outlier.

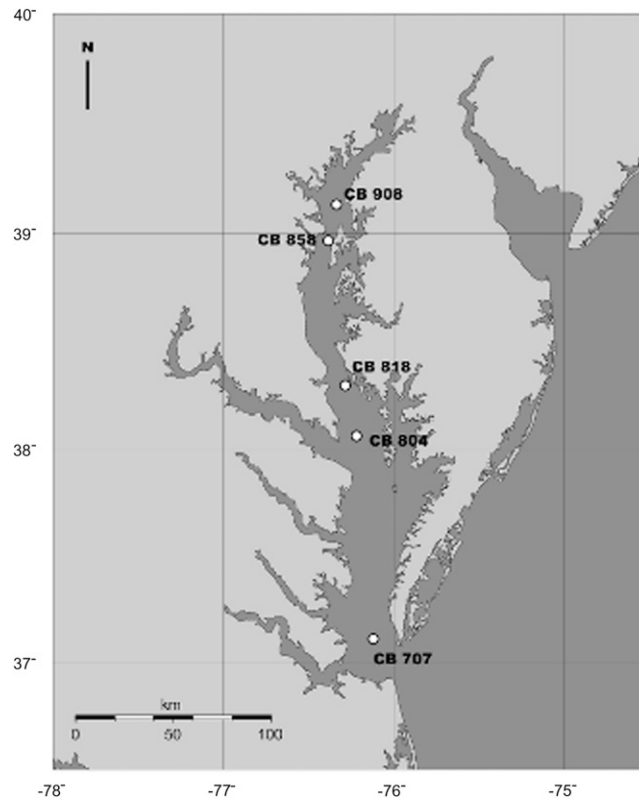

Fig. S3. Sampling locations in the Chesapeake Bay.



**Table S2. Spearman's rank correlation coefficients between variables in the Chesapeake Bay**

|            | Temperature | Salinity | BP       | <i>Synechococcus</i> abundance | VA      | BA      | VBR     |
|------------|-------------|----------|----------|--------------------------------|---------|---------|---------|
| VP         | 0.015       | 0.213    | -0.027   | 0.015                          | 0.344** | 0.260*  | -0.147  |
| VMM        | 0.016       | 0.213    | -0.027   | 0.015                          | 0.343** | 0.260*  | -0.148  |
| OC release | 0.015       | 0.213    | -0.028   | 0.014                          | 0.344** | 0.259*  | -0.147  |
| %BP        | -0.475**    | 0.190    | -0.690** | -0.455**                       | 0.142   | -0.236* | 0.264** |
| %BA        | -0.368**    | 0.238*   | -0.418** | -0.314**                       | 0.068   | -0.359* | 0.388** |
| VBR        | -0.463**    | 0.175    | -0.557*  | -0.447**                       | 0.250*  | -0.631* |         |
| BA         | 0.663*      | -0.119   | 0.624**  | 0.558**                        | 0.577** |         |         |
| VA         | 0.252*      | 0.082    | 0.155    | 0.275*                         |         |         |         |

All data were log transformed before analysis except salinity. \* $P \leq 0.05$ ; \*\* $P \leq 0.01$ .

**Table S3. Equations used in estimating VP, VMM, and related variables**

|                                          | Description                                                                                                                                                                                         | Equation                                                   |
|------------------------------------------|-----------------------------------------------------------------------------------------------------------------------------------------------------------------------------------------------------|------------------------------------------------------------|
| VP                                       | Calculates VP from VA and time data and corrects for loss of bacteria during filtration in viruses per hour. A VP rate is calculated for each replicate incubation, and the mean value is reported. | $VP = [(V_f - V_i) / T_f] \times (Ba / Bi)$                |
| Empirical burst size (Bz)                | Calculates burst size, in viruses per cell, from observed increase in VA over the same time period as an observed decrease in bacterial abundance within VP incubations.                            | $Bz = (V_x - V_i) / (B_x - B_i)$                           |
| VMM                                      | Calculates amount of bacterial cells lysed by viruses per hour                                                                                                                                      | $VMM = VP / 50$ or $VMM = VP / Bz$                         |
| OC released by viral lysis               | Estimates amount of OC released by viral lysis per hour. Based on an assumed carbon content of $20 \times 10^{-15}$ g of C released per host cell lysed (1).                                        | $OC = VMM \times 20 \text{ fg C}$                          |
| %BA lysed by viruses                     | Calculates percentage of bacterial community lysed by viruses per hour (2).                                                                                                                         | $\%BA = VMM / BP \times 100$                               |
| %BP lysed by viruses                     | Calculates the %BP consumed by viral lysis (3).                                                                                                                                                     | $\%BP = VMM / BP \times 100$                               |
| VTT                                      | Calculates turnover rate of viral assemblage                                                                                                                                                        | $VTT = VP / V_a$                                           |
| VBR                                      | Calculates the ratio of viruses to bacteria                                                                                                                                                         | $VBR = VA / BA$                                            |
| Percent OC (%OC) supplied by viral lysis | Calculates percent of OC needed to support BP provided by viral lysis assuming $20 \times 10^{-15}$ g of C per cell and bacterial growth efficiency of 20%                                          | $\%OC = OC / [(Ba \times 20 \times 24 \times 1000) / 0.2]$ |

$V_f$ , VA at final time point;  $V_i$ , VA at initial time point;  $T_f$ , time in hours at final time point;  $Ba$ , ambient bacterial abundance;  $B_i$ , mean bacterial abundance at initial time point in all incubations;  $V_x$ , VA at time point  $x$ ;  $B_x$ , BA at time point  $x$ ;  $V_a$ , ambient viral abundance; BP, BP in cells per mL per h.

- Lee S, Fuhrman J (1987) Relationships between biovolume and biomass of naturally derived marine bacterioplankton. *Appl Environ Microbiol* 53:1298–1303.
- Jiang SC, Paul JH (1994) Seasonal and diel abundance of viruses and occurrence of lysogeny/bacteriocinogeny in the marine environment. *Mar Ecol Prog Ser* 104:163–172.
- Steward GF, Smith DC, Azam F (1996) Abundance and production of bacteria and viruses in the Bering and Chukchi Seas. *Mar Ecol Prog Ser* 131:287–300.

**Table S4. VMM and viral impacts on BA and BP based on empirically determined burst sizes in the Chesapeake Bay**

|               | $n$ | Burst size | VMM, $\times 10^5$ cells per mL per h | %BA lysed, per day | %BP lysed |
|---------------|-----|------------|---------------------------------------|--------------------|-----------|
| <b>Season</b> |     |            |                                       |                    |           |
| Winter        | 23  | 100 (130)  | 1.0                                   | 93                 | 230       |
| Spring        | 31  | 130 (190)  | 0.52                                  | 20                 | 44        |
| Summer        | 25  | 31 (59)    | 2.8                                   | 68                 | 94        |
| Autumn        | 25  | 42 (59)    | 1.6                                   | 69                 | 173       |
| <b>Month</b>  |     |            |                                       |                    |           |
| February      | 11  | 130 (180)  | 0.55                                  | 50                 | 140       |
| March         | 15  | 150 (190)  | 0.80                                  | 64                 | 120       |
| April         | 8   | 120 (110)  | 0.64                                  | 46                 | 180       |
| May           | 7   | 14 (9.4)   | 1.8                                   | 100                | 150       |
| June          | 13  | 130 (190)  | 0.64                                  | 16                 | 41        |
| July          | 17  | 18 (14)    | 4.9                                   | 106                | 160       |
| August        | 8   | 61 (100)   | 1.3                                   | 36                 | 47        |
| September     | 6   | 23 (15)    | 1.4                                   | 47                 | 110       |
| October       | 19  | 48 (66)    | 0.96                                  | 42                 | 100       |

Data reported as mean (SD).  $n$  represents total number of burst sizes calculated.
